# Supplementary material
Source: HighWire-hosted journal article supplement (https://erj.ersjournals.com/content/55/6/2001130)
Supplement: inline-supplementary-material-1 [file inline-supplementary-material-1.pdf]

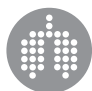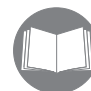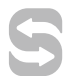

SHAREABLE PDF

# Collagen IV: a critical new starting point for engineering upper airways

Martina M. De Santis <sup>1,2,3</sup> and Darcy E. Wagner <sup>1,2,3</sup>

**Affiliations:** <sup>1</sup>Lung Bioengineering and Regeneration, Dept of Experimental Medical Sciences, Faculty of Medicine, Lund University, Lund, Sweden. <sup>2</sup>Wallenberg Molecular Medicine Center, Faculty of Medicine, Lund University, Lund, Sweden. <sup>3</sup>Lund Stem Cell Center, Faculty of Medicine, Lund University, Lund, Sweden.

**Correspondence:** Darcy E. Wagner, Lund University, Dept of Experimental Medical Sciences, B10 BMC Lund, Sweden. E-mail: darcy.wagner@med.lu.se

@ERSpublications

**Collagen IV and integrin alpha 2 engagement is critical for forming differentiated airway epithelium capable of mucociliary clearance *in vitro*, but pre-vascularised scaffolds transplanted under immunosuppression fail to maintain differentiated epithelium** <https://bit.ly/2wT9XK5>

**Cite this article as:** De Santis MM, Wagner DE. Collagen IV: a critical new starting point for engineering upper airways. *Eur Respir J* 2020; 55: 2001130 [<https://doi.org/10.1183/13993003.01130-2020>].

This single-page version can be shared freely online.

Half a century has passed since the discovery of collagen IV in 1966 by KEFALIDES [1]. Collagen IV is the main collagen component of the basement membrane in many organs, including the lung and trachea. It is a network-forming collagen that underlies epithelial and endothelial cells and serves a crucial role in forming barriers between tissue compartments [2, 3]. Mature collagen IV is a heterotrimer comprised from a combination of two or three of the six known collagen IV alpha chains which are increasingly recognised as being tissue- and organ-specific. Integrin  $\alpha 2$  is a known cellular receptor for attachment to collagen IV and through interactions with different binding partners, influences cell adhesion, migration and polarity [4].
